# Supplementary material for: Skin Interstitial Fluid and Plasma Multiplex Cytokine Analysis Reveals IFN-γ Signatures and Granzyme B as Useful Biomarker for Activity, Severity and Prognosis Assessment in Vitiligo
Source: PubMed Central journal article supplement (PMC9021541; doi:10.3389/fimmu.2022.872458), 2022-04-07
Supplement: Image_1.pdf [file Image_1.pdf]

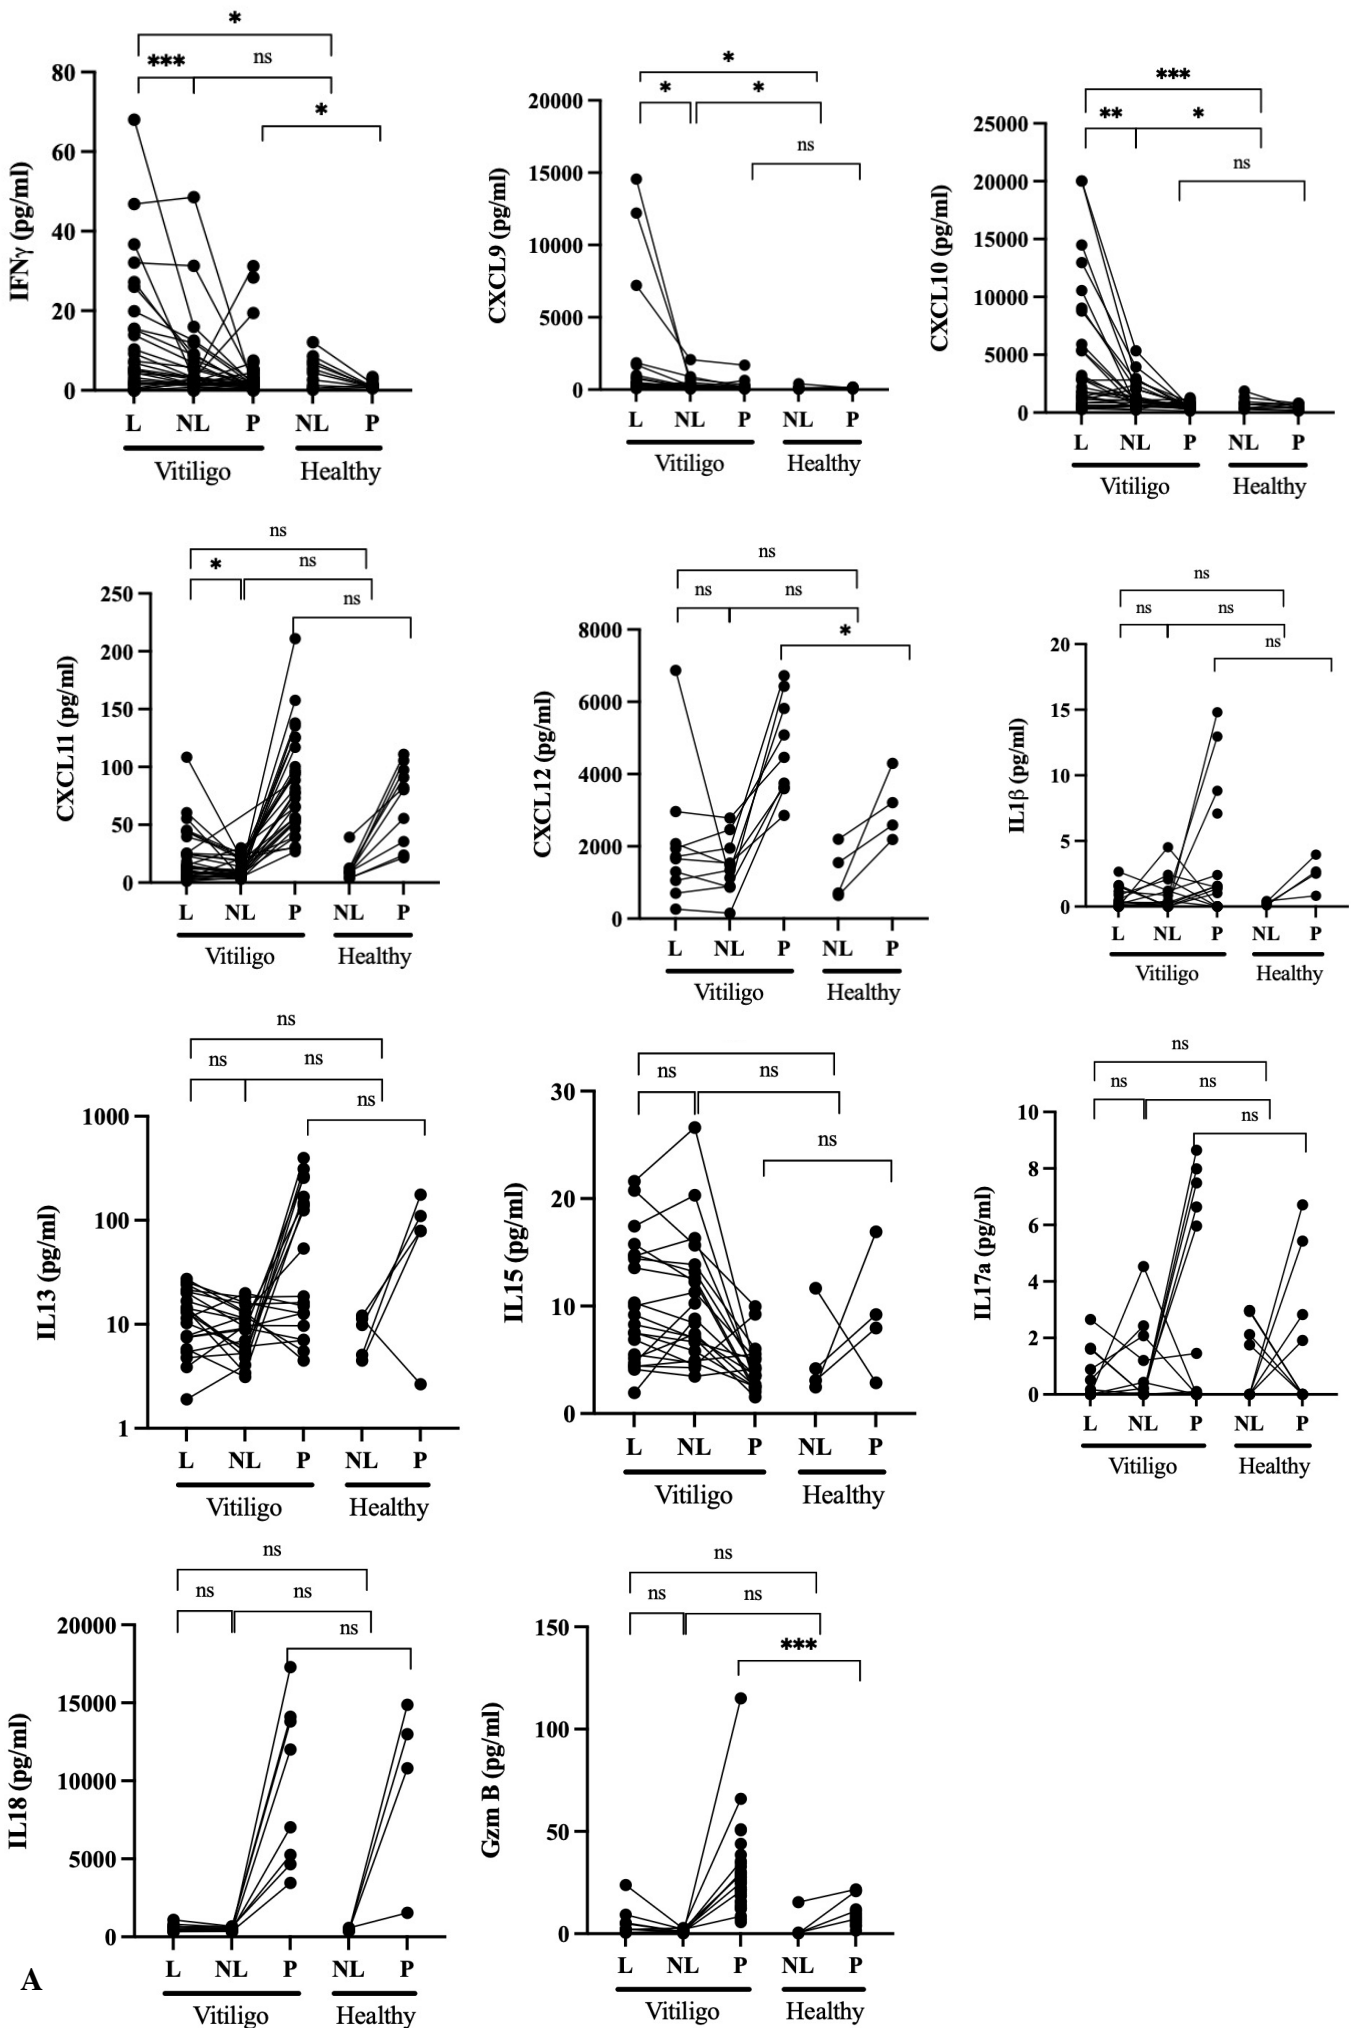

A

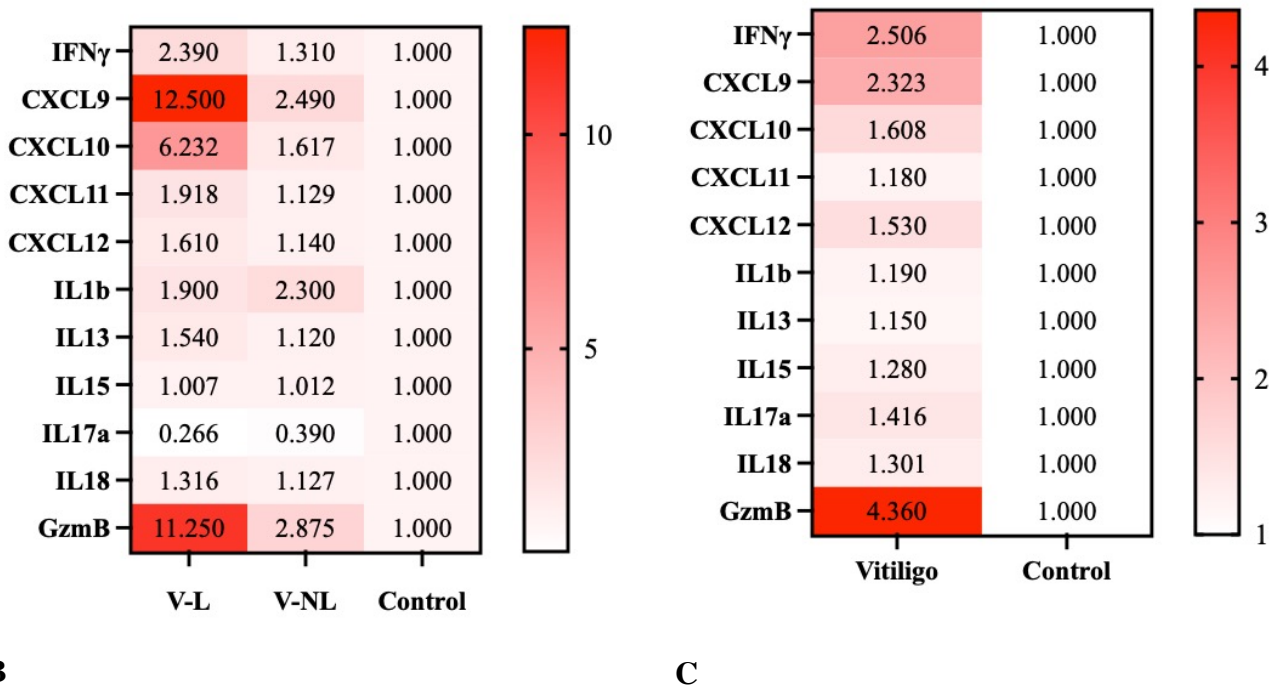

**Figure 1** IFN $\gamma$ , CXCL9, CXCL10 and Granzyme B are highly expressed in the skin lesion and plasma of vitiligo patients compare to healthy controls. **A.** Cytokine panel expression of paired lesion and non-lesion skin blister interstitial fluid and plasma analyte in vitiligo patients and healthy controls. **B.** Relative fold change cytokine panel in skin blisters interstitial fluid analyte in lesion and non-lesion skin of vitiligo patients compare to healthy controls. **C.** Relative fold change of cytokine panel in plasma analyte of vitiligo patients compare to healthy controls. (V:Vitiligo, L: lesion, NL: non-lesion; \*  $p < 0.05$ , \*\*  $p < 0.01$ , \*\*\*  $p < 0.001$ ; ns: non-significant)

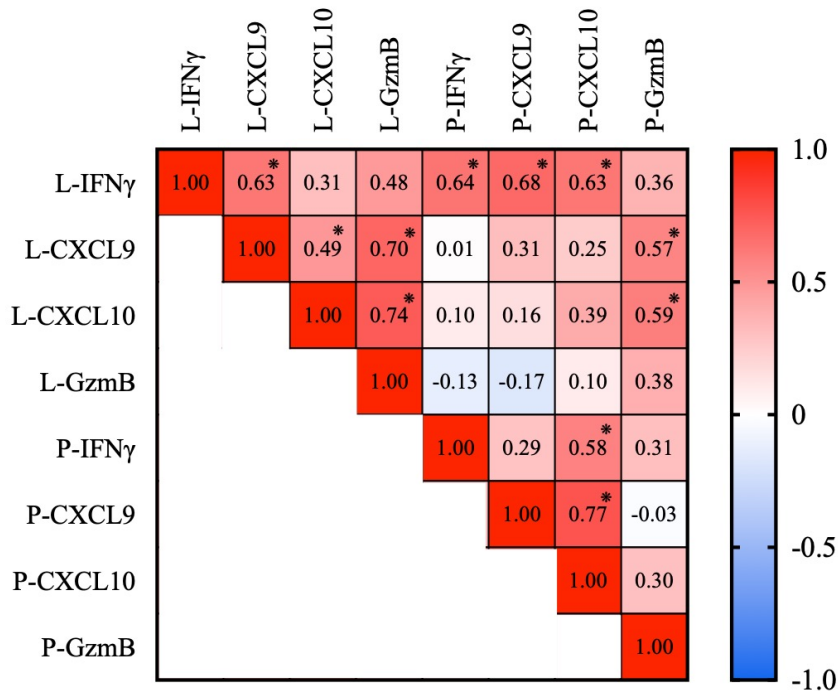

**Figure 2.** Pearson correlation analysis of IFN $\gamma$ , CXCL9, CXCL10 and GzmB expression in skin blister interstitial fluid and plasma analyte in vitiligo patients. Plasma IFN $\gamma$ , CXCL9 and CXCL10 expression is positively correlated with the skin lesion IFN $\gamma$  expression. Plasma Granzyme B is correlated with skin lesion GzmB, CXCL9 and CXCL10. (\*  $p < 0.05$ , L: lesion, NL: non-lesion, P: plasma)

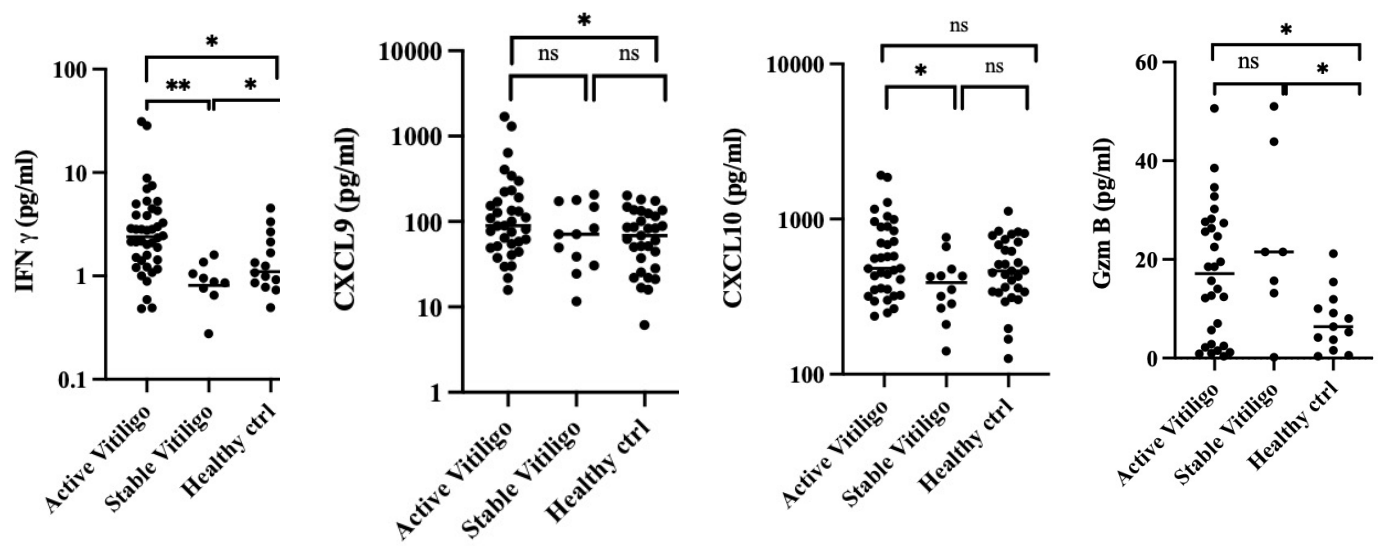

A.

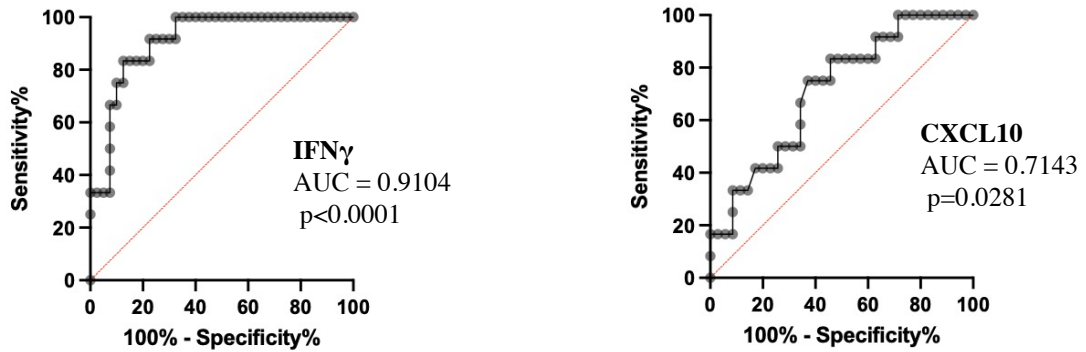

B.

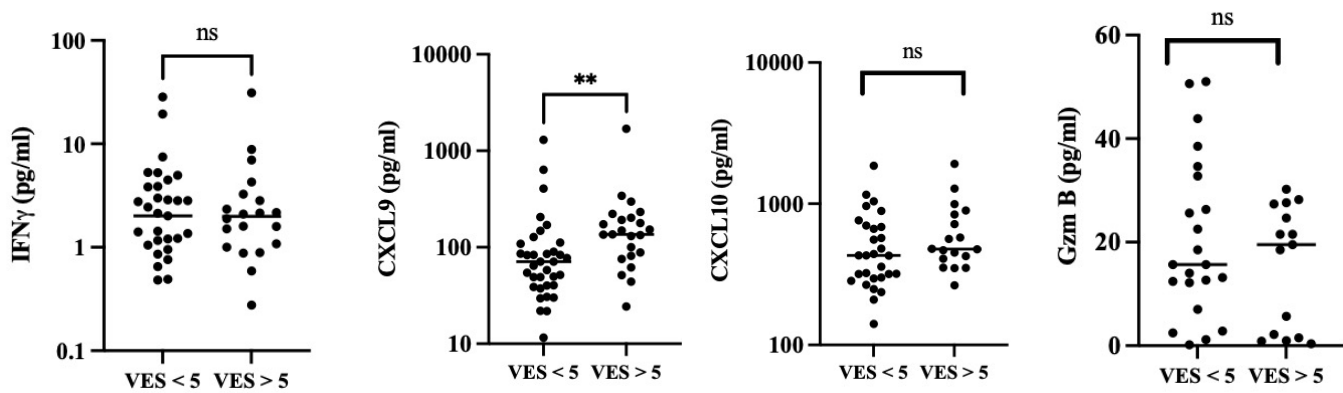

C.

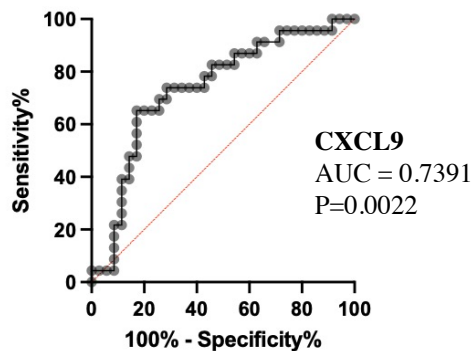

D.

**Figure 3.** IFN $\gamma$  and CXCL10 are correlated with disease activity, whereas CXCL9 is associated with disease severity in vitiligo patients. **A.** Disease activity: IFN $\gamma$ , CXCL9, CXCL10, and Gzm B in active and stable vitiligo and healthy control. **B.** ROC curve for disease activity in IFN $\gamma$  and CXCL10, negative data of CXCL9 and Gzm B not shown. **C.** Disease severity: IFN $\gamma$ , CXCL9, CXCL10, and Gzm B in VES < 5 and VES > 5 vitiligo patients. **D.** ROC curve for disease severity in CXCL9, negative data of IFN $\gamma$ , CXCL10 and Gzm B not shown (\*  $p < 0.05$ , \*\*  $p < 0.01$ , \*\*\*  $p < 0.001$ )

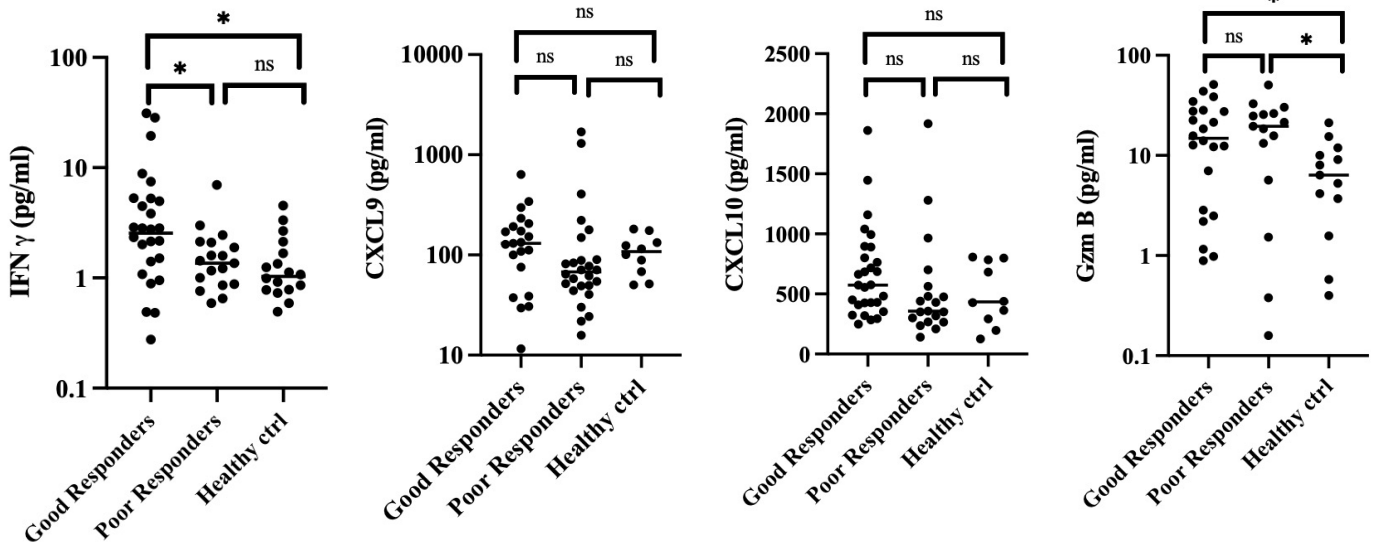

A.

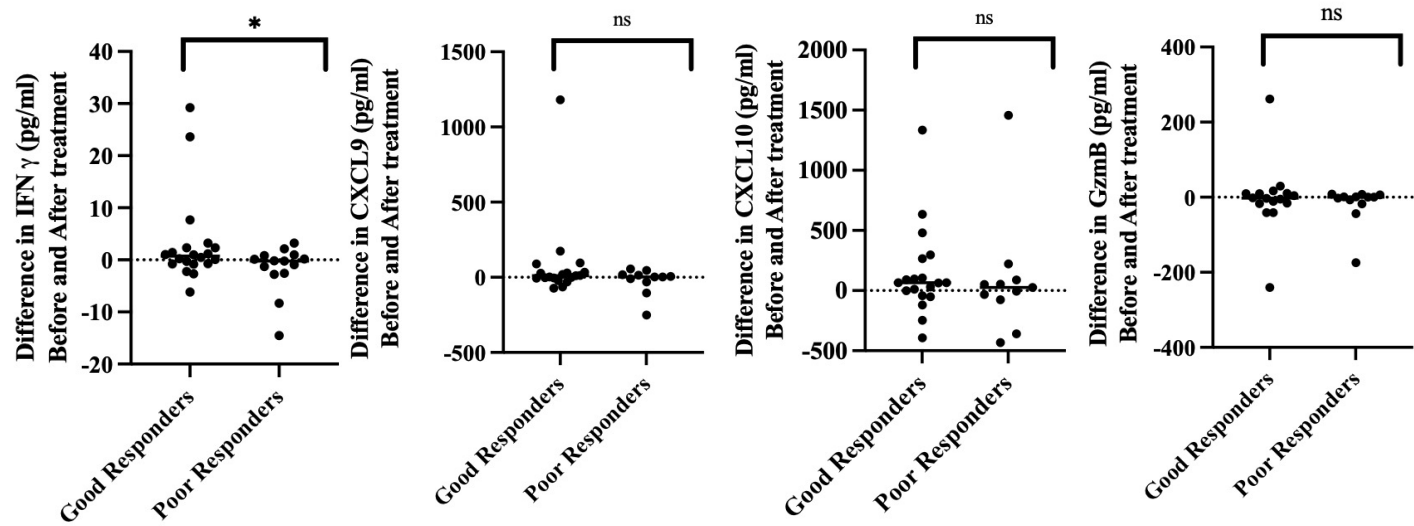

B.

**Figure 4.** A decrease in IFN- $\gamma$  expression level before and six months after treatment correlates with good treatment response. **A.** Cytokine expression of IFN- $\gamma$ , CXCL9, CXCL10, and GzmB at the initial visit. **B.** Difference in IFN- $\gamma$ , CXCL9, CXCL10, and GzmB expression before and six months after treatment. (\* p < 0.05, \*\* p < 0.01, \*\*\* p < 0.001)

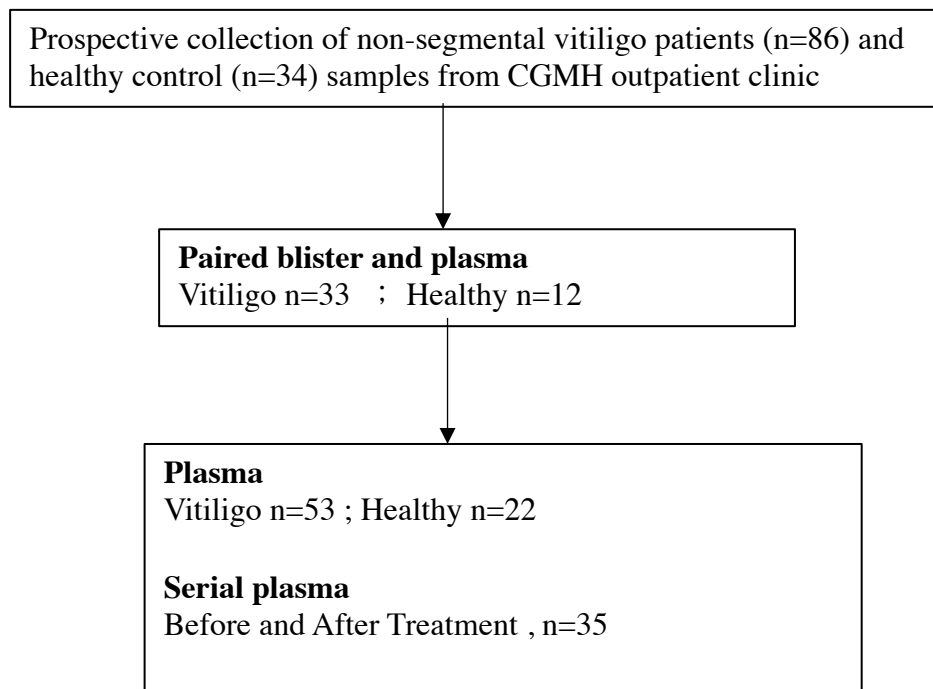

**Supplement Fig 1.** Patient collection flow chart.
